# Supplementary material for: In-hospital mortality of cardiogenic shock complicating ST-elevation myocardial infarction in Malaysia: a retrospective analysis of the Malaysian National Cardiovascular Database (NCVD) registry
Source: PubMed Central journal article supplement — BMJ Open. 2019 May 5;9(5):e025734. doi: 10.1136/bmjopen-2018-025734 (PMC6502239; doi:10.1136/bmjopen-2018-025734), 2019-05-05
Supplement: bmjopen-2018-025734.draft_revisions.pdf [file bmjopen-2018-025734.draft_revisions.pdf]

# BMJ Open

BMJ Open is committed to open peer review. As part of this commitment we make the peer review history of every article we publish publicly available.

When an article is published we post the peer reviewers' comments and the authors' responses online. We also post the versions of the paper that were used during peer review. These are the versions that the peer review comments apply to.

The versions of the paper that follow are the versions that were submitted during the peer review process. They are not the versions of record or the final published versions. They should not be cited or distributed as the published version of this manuscript.

BMJ Open is an open access journal and the full, final, typeset and author-corrected version of record of the manuscript is available on our site with no access controls, subscription charges or pay-per-view fees (<http://bmjopen.bmj.com>).

If you have any questions on BMJ Open's open peer review process please email [info.bmjopen@bmj.com](mailto:info.bmjopen@bmj.com)

# BMJ Open

## THE IN-HOSPITAL OUTCOME OF CARDIOGENIC SHOCK COMPLICATING ST-ELEVATION MYOCARDIAL INFARCTION IN MALAYSIA: AN OVERVIEW OF THE MALAYSIAN NATIONAL CARDIOVASCULAR DATABASE – ACUTE CORONARY SYNDROME REGISTRY YEAR 2006 TO 2013

|                               |                                                                                                                                                                                                                                                                                                                                                                                                                                                                                                                                                                                           |
|-------------------------------|-------------------------------------------------------------------------------------------------------------------------------------------------------------------------------------------------------------------------------------------------------------------------------------------------------------------------------------------------------------------------------------------------------------------------------------------------------------------------------------------------------------------------------------------------------------------------------------------|
| Journal:                      | <i>BMJ Open</i>                                                                                                                                                                                                                                                                                                                                                                                                                                                                                                                                                                           |
| Manuscript ID                 | bmjopen-2018-025734                                                                                                                                                                                                                                                                                                                                                                                                                                                                                                                                                                       |
| Article Type:                 | Research                                                                                                                                                                                                                                                                                                                                                                                                                                                                                                                                                                                  |
| Date Submitted by the Author: | 07-Aug-2018                                                                                                                                                                                                                                                                                                                                                                                                                                                                                                                                                                               |
| Complete List of Authors:     | Venkatason, Padmaa; University of Malaya Faculty of Medicine, Department of medicine; University of Malaya Faculty of Medicine, Department of medicine<br>Zubairi, Yong; University of Malaya<br>Wan Ahmad, Wan; University of Malaya Faculty of Medicine, Medicine Department<br>Hafidz, Muhammad; University of Malaya Faculty of Medicine, Medicine Department<br>Ismail, Muhammad Dzafir ; University of Malaya Medical Centre, Cardiology<br>Hadi, Muhammad; University of Malaya Faculty of Medicine<br>Zuhdi, Ahmad Syadi Mahmood; University of Malaya Medical Centre, Cardiology |
| Keywords:                     | Adult cardiology < CARDIOLOGY, Ischaemic heart disease < CARDIOLOGY, Myocardial infarction < CARDIOLOGY                                                                                                                                                                                                                                                                                                                                                                                                                                                                                   |
|                               |                                                                                                                                                                                                                                                                                                                                                                                                                                                                                                                                                                                           |

SCHOLARONE™  
Manuscripts

1  
2  
3  
4  
5  
6  
7  
8  
9  
10  
11  
12  
13  
14  
15  
16  
17  
18  
19  
20  
21  
22  
23  
24  
25  
26  
27  
28  
29  
30  
31  
32  
33  
34  
35  
36  
37  
38  
39  
40  
41  
42  
43  
44  
45  
46  
47  
48  
49  
50  
51  
52  
53  
54  
55  
56  
57  
58  
59  
60

**Long Title:**

“THE IN-HOSPITAL OUTCOME OF CARDIOGENIC SHOCK COMPLICATING ST-ELEVATION MYOCARDIAL INFARCTION IN MALAYSIA: AN OVERVIEW OF THE MALAYSIAN NATIONAL CARDIOVASCULAR DATABASE – ACUTE CORONARY SYNDROME REGISTRY YEAR 2006 TO 2013”

**Short title:**

CARDIOGENIC SHOCK COMPLICATING ST-ELEVATION MYOCARDIAL INFARCTIONS IN MALAYSIAN PATIENTS

For peer review only

**Authors:**

Padmaa Venkatason<sup>1</sup>, Yong Z Zubairi<sup>2</sup>, Wan Azman Wan Ahmad<sup>1</sup>, Muhammad Imran Abdul

Hafidz, <sup>1</sup>Muhammad Dzafir Ismail<sup>1</sup>, Mohd Firdaus Hadi<sup>1</sup>, Ahmad Syadi Mahmood Zuhdi<sup>1</sup>

1. Cardiology Unit, Medical Department, University Malaya Medical Centre, Kuala Lumpur, Malaysia
2. Foundation Studies in Science, University of Malaya, Faculty of Medicine, Kuala Lumpur, Wilayah Persekutuan, Malaysia

**Corresponding Author:**

1. Padmaa Venkatason  
Cardiology Unit, Department of Medicine  
University Malaya, 59100 Kuala Lumpur, Malaysia  
E mail: [padmaavenkatason@yahoo.com](mailto:padmaavenkatason@yahoo.com)  
Tel: +60 125058221

**Abstract****Objectives:**

Cardiogenic shock (CS) complicating ST-elevation myocardial infarction (STEMI) carries an extremely high mortality. Its incidence and outcome in Malaysia has never been fully reported. The purpose of our study is to explore the extent of CS in our population.

**Design:**

Patients were identified from the Malaysian National Cardiovascular Disease – Acute Coronary Syndrome database registry (NCVD-ACS) from 2006 to 2013.

**Participants:**

16,517 STEMI patients

**Primary Outcome Measures:**

Relative mortality risk ratios and clinical predictors of in hospital mortality among CS patients.

**Results:**

CS complicated 10.6% of all STEMI. They had unfavorable premorbid conditions and poor outcomes. The in-hospital mortality rate was 34.1% with a risk ratio of 7.14. Intravenous thrombolysis remained as the main urgent reperfusion modality. Percutaneous coronary interventions (PCI) conferred a 40% risk reduction over non-invasive therapy but were done in only 33.6% of CS cases. Age over 65, diabetes mellitus, hypertension, chronic lung and kidney disease conferred higher risk of mortality.

**Conclusion:**

Mortality rates of CS complicating STEMI in Malaysia are high. In-hospital PCI confers a 40% mortality risk reduction but the rate of PCI among our patients with CS complicating STEMI is still low. Efforts are being made to increase access to invasive therapy for these patients.

**Trial Registration Number:** NMRR-07-20-250

**Keywords:** Cardiogenic shock; myocardial infarction; percutaneous coronary intervention; mortality; acute coronary syndrome

**STRENGTHS AND LIMITATIONS**

- To our knowledge, this is the first study in Malaysia to compare cardiogenic shock and non-cardiogenic shock patients using nationally representative data
- The analysis accounted for a multivariate adjustment and binary logistics regression in estimating the relative mortality risk ratios between the two groups.
- Efforts are being made to increase coverage of primary PCI through the development of a hub and spoke model for ST elevation myocardial.
- PCI in Malaysia is more costly than thrombolysis.
- There is insufficient data on intra-aortic balloon pump or assist devices in this registry.

## INTRODUCTION

Cardiogenic shock (CS) is an important cause of death in acute ST elevation myocardial infarction (STEMI) (1-3). Despite the advancement in reperfusion therapy with invasive percutaneous coronary intervention (PCI), the mortality rate remains high. The in-hospital mortality rate even after successful PCI are reported to be as high as 40% (4-6). Although the incidence of CS complicating myocardial infarctions is only around 4% to 10% (1,7), it remains a big challenge in terms of clinical management.

Due to various limitations locally, the rate of coronary reperfusion with primary PCI in STEMI is only about 7% in Malaysia (8). Yet, the outcome of CS complicating myocardial infarctions in our population has never been fully described and no comparison ever made with other studies. Hence, we utilize data from the Malaysian National Cardiovascular Database – Acute coronary syndrome 2006 to 2013 (NCVD-ACS 2006 to 2013) to investigate the characteristics and outcome of CS complicating STEMIs in Malaysia.

## METHODS:

### Patient population

A total of 16,517 patients diagnosed with STEMI were identified from the Malaysian National Cardiovascular Database- Acute coronary syndrome (NCVD-ACS) from year 2006 to 2013. The NCVD is a national registry involving 18 hospitals nationally. It captures clinical data on all patients admitted with acute coronary syndromes. The Ministry of Health (MOH) Malaysia and the National Heart Association of Malaysia (NHAM) sponsor the registry. Data is collected upon admission and throughout the patient stay using a standardized case reporting form. A unique national identification number is given to each patient to avoid duplication. Parameters recorded include baseline characteristics and clinical presentation, in-hospital treatment, procedural details and clinical outcome.

STEMI is defined as a persistent ST-segment elevation of  $\geq 1$  mm in two contiguous electrocardiographic leads or the presence of a new left bundle branch block in the setting of positive cardiac markers and/or typical cardiac pain. Patients were divided into 2 groups based on their Killip class on presentation. Those in Killip class IV were grouped under 'cardiogenic shock' (n=1753) while those in Killip class I, II and III were grouped under 'non-cardiogenic shock' (n=14764). The 2 groups were compared in terms of clinical characteristics, in-hospital invasive treatment, pharmacotherapy and all cause in-hospital mortality. A cross check with the national death registry was also done to verify the patients' mortality status.

The results of the study will be made public in National Heart Association of Malaysia website through the National Cardiovascular Disease Database (NCVD) annual



1  
2  
3 reports in interest for the view of the participants. In this study we use retrospective cohort  
4  
5 studies looking at data that has already been existing.  
6

### 7 **Definition of Killip class**

8  
9 Killip class IV is defined as the presence of hypotension with a systolic BP lower than  
10  
11 90mmHg and evidence of peripheral vasoconstriction. Below are the definitions of the other  
12  
13 Killip classes:  
14

15 Killip I: No clinical signs of heart failure,  
16

17 Killip II: Presence of rales or crepitation in the lungs bases only or a third heart sound (S3),  
18

19 Killip III: Presence of frank acute pulmonary oedema  
20

21 Killip IV: Cardiogenic shock or hypotension (measured as systolic blood pressure < 90  
22  
23 mmHg), and evidence of peripheral vasoconstriction  
24  
25  
26  
27

### 28 **Statistical analysis**

29  
30 Categorical variables were described as numbers and percentages. The differences  
31  
32 were analysed by chi-square test or Fisher exact test. Continuous variables were expressed as  
33  
34 median and differences were analysed using t-test. To avert biases in the estimates and loss of  
35  
36 power, missing data for explanatory variables were assumed to be missing at random. A  
37  
38 generalized linear model with a log link, binomial distribution, and a robust variance  
39  
40 estimator was used to estimate the risk ratios. The risk ratios represent the relative risk for  
41  
42 mortality of the non-cardiogenic shock group compared to the cardiogenic shock group.  
43  
44 Subsequently, risk ratios of CS patients with PCI done and without PCI were also compared.  
45  
46 Variables that were statistically significantly different (a 2-sided P value of less than 0.05)  
47  
48 between the CS and non-CS patients, that were of clinical importance, and that had sufficient  
49  
50 outcomes in the respective subcategories were adjusted for. Finally, binary logistics  
51  
52 regression was executed to determine the independent predictor of in-hospital mortality  
53  
54  
55  
56  
57  
58  
59  
60

1  
2  
3 among CS patients. All analyses were conducted using SPSS statistical software (version 21,  
4 IBM SPSS Statistics, USA).  
5  
6  
7  
8  
9

## 10 11 **RESULTS:**

12  
13 Table I illustrates the comparison in baseline characteristics between the CS and non-  
14 CS group. Demographically, the CS group contained more patients over the age of 65 (28.6%  
15 Vs 22.6%  $P < 0.001$ ). Females and Malay ethnic groups were also seen to be significantly  
16 more prevalent in the cardiogenic shock group. In terms of cardiovascular risk factors, they  
17 had higher rate of diabetes and hypertension but unexpectedly lower rate of smoking,  
18 hyperlipidaemia and premature family history. Other related premorbid conditions were  
19 unfavourable to the CS group where they had higher rate of previous MI, cerebrovascular,  
20 peripheral vascular, chronic kidney and chronic lung diseases.  
21  
22  
23  
24  
25  
26  
27  
28  
29  
30  
31  
32

33 Table II compares the revascularisation treatment between the 2 groups. Intravenous  
34 thrombolysis remained the main emergency reperfusion therapy for both CS and non-CS  
35 patients. Although there was no significant difference of symptom to door times between the  
36 2 groups, the door to needle time was significantly shorter for CS patients (45 minutes vs. 60  
37 minutes  $P < 0.001$ ). The difference in the rate of primary PCIs between the 2 groups was  
38 small (11.7% CS vs. 10.0% non-CS). Total rate of in-hospital PCIs (inclusive of primary  
39 PCIs) was however significantly higher in CS patients (33.6% vs. 29.5%  $P = 0.001$ ). Table III  
40 shows the administrative rate of evidence-based pharmacotherapy during the admission,  
41 which favoured the non-CS patients across all class of medications especially  
42 antihypertensives.  
43  
44  
45  
46  
47  
48  
49  
50  
51  
52  
53  
54  
55  
56  
57  
58  
59  
60

1  
2  
3 Table IV compares the all cause in-hospital mortality rate between patients with CS  
4 and non-CS. The mortality rate was different between the 2 groups (34.1% CS vs. 5.6% non-  
5 CS, P value <0.001) After multivariate adjustment of confounding factors, we found that the  
6 CS group had 7.14 times higher mortality risk compared to the non-CS group.  
7  
8  
9  
10

11  
12  
13 Mortality data was obtained from official records from the National Registration  
14 Department of Malaysia and cross-referenced to patients, however we were unable to get  
15 information for 29 patients (0.017%) in the CS group for undetermined reasons. Table V sub-  
16 analyses the in-hospital mortality rates among CS patients. Those who had PCI done during  
17 the admission had a lower rate of in-hospital mortality (27.0% vs. 38.9%) compared to those  
18 who did not. Adjusted mortality risk ratio showed that there was a 40% mortality risk  
19 reduction in those with PCI done.  
20  
21  
22  
23  
24  
25  
26  
27  
28  
29  
30

31 Table VI shows univariate analysis of clinical variables related to mortality in the CS  
32 group. All variables that were statistically significant from this table were then grouped into a  
33 multivariate logistic regression to determine the independent predictors of in-hospital  
34 mortality within the CS group. The result of the multivariate logistic regression is tabulated in  
35 Table VII. We found that the presence of hypertension, diabetes mellitus, chronic lung and  
36 kidney diseases, and age of over 65 carried statistically significantly higher mortality risks  
37 and hence they seem to be independent predictors of in-hospital mortality. Table VIII shows  
38 the length of stay between the two groups. Patients with CS have significantly longer  
39 duration of inpatient stay compared to non-CS.  
40  
41  
42  
43  
44  
45  
46  
47  
48  
49  
50  
51  
52  
53  
54  
55  
56  
57  
58  
59  
60

## DISCUSSION:

Cardiogenic shock (CS) is a clinical state where cardiac dysfunction results in inadequate tissue perfusion. CS is characterised by a state of haemodynamic insufficiency that may involve hypotension (systolic blood pressure <90 mmHg), significant decrease in mean arterial pressure (MAP) from baseline, and reduced cardiac index. CS can be multifactorial but most commonly occurs secondary to myocardial infarction (MI).

CS complicating a myocardial infarction more commonly occurs in ST elevation myocardial infarctions compared to non-ST elevation myocardial infarctions and is a predictor of poor prognosis. Data from our NCVD registry showed in-hospital mortality rates of 34.1%. This figure is lower than other MI registries and trials such as the SHOCK trial, which reported in hospital mortality rates of at least 48%. Reasons for the lower figures are unclear, but may be contributed to by a common practice of early hospital discharging of STEMI patients, which may not capture data on patients who died at home early after discharge that would be reflected in 30-day outcomes if this data was available.

Preexisting conditions including hypertension, diabetes mellitus, chronic kidney and lung disease conferred a higher risk of death in our patients, which may reflect poor pre-hospital reserve that is ill prepared to cope with a major stressor such as cardiogenic shock. Increasing age was also a predictor of mortality in our cohort with adults over 65 years of age

1  
2  
3 more than twice more likely to die in hospital if they had CS complicating a STEMI. Age was  
4  
5 also found in another study to be the parameter most strongly associated with developing  
6  
7 cardiogenic shock after a myocardial infarction with every 10-year increase in age the risk of  
8  
9 developing shock was greater by 47%(11). We observed an interesting finding of  
10  
11 significantly lower rates of smoking, family history and dyslipidaemia in the CS group. It is  
12  
13 not clear whether this represents under-reporting or under-diagnosis of risk factors or these  
14  
15 are paradoxical risk factors for developing CS in STEMI in our population. Nonetheless,  
16  
17 further studies would be appropriate to investigate this further, perhaps with future data from  
18  
19 NCVD.  
20  
21  
22  
23

24 Data shows that cardiogenic shock patients in the setting of acute myocardial  
25  
26 infarction who were treated non-invasively had poorer outcome and primary PCI is superior  
27  
28 to thrombolytic therapy (9-13). Similar to other registries and studies, our data showed  
29  
30 improved survival for patients who underwent in-hospital PCI including primary PCI (12).  
31  
32 The adjusted risk of death was reduced by 40% for patients who received PCI during the  
33  
34 index admission compared to those who did not. Intravenous thrombolysis remains the most  
35  
36 frequent mode of achieving reperfusion in Malaysia due to several factors. PCI in Malaysia is  
37  
38 more costly than thrombolysis and primary or urgent PCI services are limited to patients  
39  
40 presenting to one of several PCI centres or their network hospitals, which explains why  
41  
42 around only 10% of patients received primary PCI. Nonetheless, in the SHOCK trial,  
43  
44 thrombolysis was superior to medical therapy only and is recommended in many guidelines  
45  
46 as a reperfusion strategy when PCI is not possible or delayed, particularly when patients  
47  
48 present within 3 hours of symptoms (14). We did not have any data on intra-aortic balloon  
49  
50 pump or assist devices in our patients in this registry. Our data showed a shorter door to  
51  
52 needle time in patients presenting with CS compared to non-CS. We postulate several factors  
53  
54  
55  
56  
57  
58  
59  
60

1  
2  
3 - CS patients would be appear more ill during initial assessment and the presence of  
4 hypotension would likely push for more urgent and swift diagnostic and management steps.  
5  
6 In our personal experience, patients with non-CS STEMI may also present in atypical ways  
7  
8 that may delay or make assessment less urgent, hence explain the longer door to needle time.  
9  
10 Ideally we would have included the door to balloon data for comparison, however that data is  
11  
12 contained in a separate registry called the NCVD-PCI registry, which we did not have access  
13  
14 to.  
15  
16  
17  
18  
19

20 Efforts are being made to increase coverage of primary PCI through the development  
21  
22 of a hub and spoke model for ST elevation myocardial infarctions called the MySTEMI  
23  
24 Network. Non-PCI centres (hub) are paired with a PCI capable centre (spoke) whereby  
25  
26 patients presenting to a non-PCI hospital with a STEMI are transferred to a PCI centre for  
27  
28 primary PCI (15). We hope that with the rolling out of this MySTEMI Network nationally,  
29  
30 we are able to offer PCI as the main reperfusion modality for STEMI patients. Efforts are  
31  
32 also being made to improve prescribing rates of evidence-based therapy through clinical  
33  
34 audits and CME sessions. There was a low rate of antiplatelet prescription particularly in the  
35  
36 CS group, which has been noted in other local studies (8,16). Although the exact reasons to  
37  
38 explain the low prescription rates in our population were not detailed in the NCVD registry,  
39  
40 one factor could be the increased bleeding rates in patients with CS (17). We recognise that  
41  
42 although our findings are based on the NCVD data, these may not be truly representative of  
43  
44 the current situation. The current NCVD is incomplete as there are still several hospitals that  
45  
46 are not yet fully contributing towards NCVD data; efforts are however being taken to  
47  
48 improve this. Increased reporting will only improve the accuracy of future studies and allow  
49  
50 better allocation of resources in improving outcomes.  
51  
52  
53  
54  
55  
56  
57  
58  
59  
60

## CONCLUSION:

CS complicated STEMI in about 10.6% of our patients. The in-hospital mortality was high (34.1%) and invasive coronary revascularisation lowered the mortality rate substantially. Similar to other studies, multiple comorbidities including increased age were predictors of poor prognosis. Greater effort is needed to improve outcomes and increased effort is being made to improve the rate of primary and in-hospital PCI.

## ACKNOWLEDEMENT

We would like to thank all the medical and non-medical personnel involved in the data collection and analysis of the National Cardiovascular Disease – Acute coronary syndrome (NCVD-ACS) registry. We also would like to convey our gratitude to the patients' advisers.

## CONTRIBUTORS

PV contributed in the writing of the manuscript and analyzing the data. YZZ, WAWA, MIAH, MFH contributed in the interpretation of the analysis. MDI and PV designed the study. ASMZ conceived the original idea of the study.

## FUNDING

1  
2  
3 This research received no specific grant from any funding agency in the public, commercial  
4  
5 or not-for-profit sectors.  
6  
7

### 8 9 **COMPETING INTERESTS**

10  
11 None declared.  
12  
13

### 14 15 **PATIENT CONSENT**

16  
17 Not required.  
18  
19

### 20 21 **ETHICS APPROVAL**

22  
23 The NCVD registry study was approved by the Medical Review & Ethics Committee  
24  
25 (MREC), Ministry Of Health (MOH) Malaysia in 2007 (Approval Code: NMRR-07-20-250).  
26  
27 MREC waived informed consent for NCVD.  
28  
29

### 30 31 **DATA SHARING STATEMENT**

32  
33 The data sets used for the current study are publicly available at  
34  
35 <https://figshare.com/s/25dfa5f2021730d78a0d>  
36  
37  
38

### 39 40 **PROVENANCE AND PEER REVIEW**

41  
42 Not commissioned; externally reviewed.  
43  
44  
45  
46  
47  
48  
49  
50  
51  
52  
53  
54  
55  
56  
57  
58  
59  
60



**REFERENCES:**

1. Awad H, Anderson F, Gore J, Goodman S, Goldberg R. Cardiogenic shock complicating acute coronary syndromes: Insights from the Global Registry of Acute Coronary Events. *American Heart Journal*. 2012;163(6):963-971.
2. Menon V. MANAGEMENT OF CARDIOGENIC SHOCK COMPLICATING ACUTE MYOCARDIAL INFARCTION. *Heart*. 2002;88(5):531-537.
3. Goldberg R, Samad N, Yarzebski J, Gurwitz J, Bigelow C, Gore J. Temporal Trends in Cardiogenic Shock Complicating Acute Myocardial Infarction. *New England Journal of Medicine*. 1999;340(15):1162-1168.
4. Holmes D, Berger P, Hochman J, Granger C, Thompson T, Califf R et al. Cardiogenic Shock in Patients With Acute Ischemic Syndromes With and Without ST-Segment Elevation. *Circulation*. 1999;100(20):2067-2073.
5. Urban P. A randomized evaluation of early revascularization to treat shock complicating acute myocardial infarction. The (Swiss) Multicenter Trial of Angioplasty for Shock—(S)MASH. *European Heart Journal*. 1999;20(14):1030-1038.
6. Stauffer JC, Urban P, Bleed D, et al. Result of the “Swiss” multicenter evaluation of early angioplasty for shock following myocardial infarction. *Circulation*. 1997;96(Suppl 1):I-209

- 1  
2  
3 7. Braunwald EB. Hemodynamic disturbances in acute myocardial infarction. In:  
4  
5 Braunwald EB, editor. Heart disease. Philadelphia: W.B. Saunders; 1997: 1233–45.  
6
- 7 8. Zuhdi A, Ahmad W, Zaki R, Mariapun J, Ali R, Sari N et al. Acute coronary  
8  
9 syndrome in the elderly: the Malaysian National Cardiovascular Disease Database-  
10  
11 Acute Coronary Syndrome registry. Singapore Medical Journal. 2016;57(04):191-  
12  
13 197.  
14
- 15 9. Lindholm M. Cardiogenic shock complicating acute myocardial infarction Prognostic  
16  
17 impact of early and late shock development. European Heart Journal. 2003;24(3):258-  
18  
19 265.  
20
- 21 10. Chou T, Amidon T, Ports T, Wolfe C. Cardiogenic Shock: Thrombolysis or  
22  
23 Angioplasty?. Journal of Intensive Care Medicine. 1996;11(1):37-48.  
24
- 25 11. Hasdai D, Califf R, Thompson T, Hochman J, Ohman E, Pfisterer M et al. Predictors  
26  
27 of cardiogenic shock after thrombolytic therapy for acute myocardial infarction.  
28  
29 Journal of the American College of Cardiology. 2000;35(1):136-143.  
30
- 31 12. Bates E, Topol E. Limitations of thrombolytic therapy for acute myocardial infarction  
32  
33 complicated by congestive heart failure and cardiogenic shock. Journal of the  
34  
35 American College of Cardiology. 1991;18(4):1077-1084.  
36
- 37 13. Hochman J, Sleeper L, Webb J, Sanborn T, White H, Talley J et al. Early  
38  
39 Revascularization in Acute Myocardial Infarction Complicated by Cardiogenic  
40  
41 Shock. New England Journal of Medicine. 1999;341(9):625-634.  
42
- 43 14. French J, Feldman H, Assmann S, Sanborn T, Palmeri S, Miller D et al. Influence of  
44  
45 thrombolytic therapy, with or without intra-aortic balloon counterpulsation, on 12-  
46  
47 month survival in the SHOCK trial. American Heart Journal. 2003;146(5):804-810.  
48  
49
- 50 15. Malaysian Heart [Online]. Available at: <https://www.malaysianheart.org>. Accessed 9  
51  
52 February 2017.  
53  
54  
55  
56  
57  
58  
59  
60

- 1  
2  
3 16. Lu H, Nordin R. Ethnic differences in the occurrence of acute coronary syndrome:  
4 results of the Malaysian National Cardiovascular Disease (NCVD) Database Registry  
5 (March 2006 - February 2010). *BMC Cardiovascular Disorders*. 2013;13(1).  
6  
7  
8  
9 17. Gilchrist I, Rao S. Improving outcomes in patients with cardiogenic shock: Achieving  
10 more through less. *American Heart Journal*. 2013;165(3):256-257.  
11  
12  
13  
14  
15  
16  
17  
18  
19  
20  
21  
22  
23  
24  
25  
26  
27  
28  
29  
30  
31  
32  
33  
34  
35  
36  
37  
38  
39  
40  
41  
42  
43  
44  
45  
46  
47  
48  
49  
50  
51  
52  
53  
54  
55  
56  
57  
58  
59  
60

**Table I: Baseline Characteristics of Patients with ST-Elevation Myocardial Infarction**

|                     | CS (Killip IV)<br>(n= 1753) | Non-CS (Killip I to III) ( n=14764) | P – value |
|---------------------|-----------------------------|-------------------------------------|-----------|
| Age:                |                             |                                     |           |
| 64 years or less    | 1214 (71.4%)                | 11141 (77.4%)                       | <0.001    |
| >65                 | 486 (28.6%)                 | 3252 (22.6%)                        |           |
| Gender              |                             |                                     |           |
| Male                | 1455 (83.0%)                | 12687 (85.9%)                       | 0.001     |
| Female              | 298 (17.0%)                 | 2077 (14.1%)                        |           |
| Ethnicity           |                             |                                     |           |
| Malay               | 1113 (63.5%)                | 8631 (58.5%)                        |           |
| Chinese             | 285 (16.3%)                 | 2632 (17.8%)                        | 0.001     |
| Indian              | 247 (14.1%)                 | 2466 (16.7%)                        |           |
| Others              | 108 (6.2%)                  | 1035 (7.0%)                         |           |
| Risk Factors        |                             |                                     |           |
| Smoking (active/ex) | 1109 (67.4%)                | 10020 (70.0%)                       | 0.028     |
| Diabetes            | 732 (51.3%)                 | 5257 (42.3%)                        | <0.001    |
| Hypertension        | 891 (61.3%)                 | 7270 (57.2%)                        | 0.002     |
| Hyperlipidaemia     | 372 (32.1%)                 | 3754 (35.3%)                        | 0.030     |
| Family history      | 158 (9.0%)                  | 1658 (11.2%)                        | <0.001    |
| Premorbids          |                             |                                     |           |
| Cerebrovascular     | 49 (3.4%)                   | 386 (3.1%)                          | 0.422     |

|                             |             |              |        |
|-----------------------------|-------------|--------------|--------|
| Previous MI                 | 208 (15.1%) | 1553 (12.6%) | 0.009  |
| Peripheral vascular disease | 10 (0.7%)   | 35 (0.3%)    | 0.007  |
| Chronic kidney disease      | 100 (7.1%)  | 461 (3.7%)   | <0.001 |
| Chronic lung disease        | 58 (4.1%)   | 285 (2.3%)   | <0.001 |
| Myocardial infarct type     |             |              |        |
| Inferior infarct            | 732 (41.8%) | 5310 (36.0%) | <0.001 |
| Anterior infarct            | 743 (42.4%) | 6772 (45.9%) | 0.001  |

MI=Myocardial Infarction, CS = Cardiogenic Shock, Non-CS = Non-Cardiogenic Shock

**Table II: Coronary reperfusion and revascularisation therapy in STEMI patients who have CS and do not have CS.**

|                                                | CS STEMI          | Non-CS STEMI      | p-value |
|------------------------------------------------|-------------------|-------------------|---------|
| Thrombolysis                                   |                   |                   |         |
| Given                                          | 1216 (71.4%)      | 10885 (75.2%)     |         |
| Not given – proceeded to primary angioplasty   | 199 (11.7%)       | 1451 (10.0%)      | <0.001  |
| Not given – missed                             | 129 (7.6%)        | 1690 (11.7%)      |         |
| Not given – patient refusal                    | 4 (0.2%)          | 49 (0.3%)         |         |
| Not given – contraindicated                    | 156(9.2%)         | 391 (2.7%)        |         |
| In-Hospital PCI*                               | 537 (33.6%)       | 4083 (29.5%)      | 0.001   |
| Door to needle time for thrombolysis (minutes) | 45.0              | 60.0              | <0.001  |
| Symptom to door time (minutes)                 | 249.98 +/- 224.74 | 239.34 +/- 215.37 | 0.074   |

1  
2  
3 *PCI= percutaneous coronary intervention, CS=Cardiogenic Shock, STEMI=ST*  
4 *Elevation Myocardial Infarction. In-Hospital PCI\*= Defined as PCI done during*  
5 *index admission that was not Primary Angioplasty – includes rescue PCI,*  
6 *pharmacoinvasive PCI and early routine PCI.*  
7  
8  
9  
10  
11  
12  
13  
14  
15

16 **Table III: In hospital pharmacotherapy**

| Medications    | CS STEMI<br>(n= 1753) | Non-CS STEMI (n= 14764) | p-value |
|----------------|-----------------------|-------------------------|---------|
| Aspirin        | 1024 (75.7%)          | 12470 (93.3%)           | <0.001  |
| ADP-antagonist | 632 (67.8%)           | 8346 (81.4%)            | <0.001  |
| ACE-I/ARB      | 529 (30.3%)           | 8128 (55.8%)            | <0.001  |
| Beta Blocker   | 659 (51.1%)           | 9185 (71.5%)            | <0.001  |
| Statin         | 957 (70.9%)           | 12024 (90.5%)           | <0.001  |

17  
18  
19  
20  
21  
22  
23  
24  
25  
26  
27  
28  
29  
30  
31  
32  
33 *ADP= Adenosine diphosphate, ACE-I=angiotensin converting enzyme inhibitor,*  
34 *ARB= Angiotensin Receptor Blocker, CS=Cardiogenic Shock, STEMI=ST Elevation*  
35 *Myocardial Infarction*  
36  
37  
38  
39  
40  
41  
42  
43  
44  
45  
46  
47  
48  
49

50 **Table IV: In-hospital and 30-day mortality rates.**

|             | No of<br>patients | Death (%) | Unadjusted risk ratio | Adjusted risk ratio | P-<br>value |
|-------------|-------------------|-----------|-----------------------|---------------------|-------------|
| In-hospital |                   |           |                       |                     |             |

|                   |       |             |                      |                       |        |
|-------------------|-------|-------------|----------------------|-----------------------|--------|
| mortality:        |       |             |                      |                       |        |
| CS                | 1753  | 598 (34.1%) | 6.827 (6.104, 7.954) | 7.143 (6.365, 8.017)  | <0.001 |
| Non-CS            | 14764 | 821 (5.6%)  | 1                    | 1                     |        |
| 30-day mortality: |       |             |                      |                       |        |
| CS                | 1753  | 634 (36.2%) | 7.587 (7.002, 9.552) | 8.863 (7.848, 10.009) | <0.001 |
| Non-CS            | 14764 | 1085 (7.3%) | 1                    | 1                     |        |

CS=Cardiogenic Shock, STEMI=ST Elevation Myocardial

**Table V: Comparison of Mortality Rates between Cardiogenic Shock with or without PCI**

| In Hospital mortality | No. of patients | Death (%)   | Unadjusted risk ratio | Adjusted risk ratio | P values |
|-----------------------|-----------------|-------------|-----------------------|---------------------|----------|
| PCI done              | 537             | 145 (27%)   | 0.535 (0.428, 0.670)  | 0.600 (0.513,0.700) | P<0.001  |
| PCI not done          | 1063            | 414 (38.9%) | 1                     | 1                   |          |

PCI= percutaneous coronary intervention

**Table VI: Comparison of Clinical Factors Between Survivors and Non-survivors of Cardiogenic Shock.**

|                             | Survivors<br>(n=1126) | Non-survivors<br>(n=598) | P value |
|-----------------------------|-----------------------|--------------------------|---------|
| Age >65                     | 226 (20.8%)           | 253 (43.1%)              | <0.001  |
| Diabetes                    | 429 (47.5%)           | 295 (58.2%)              | <0.001  |
| Hypertension                | 520 (56.5%)           | 361 (70.4%)              | <0.001  |
| Smoking status              |                       |                          |         |
| Active/Ex Smokers           | 607 (67.0%)           | 219 (48.6%)              | <0.001  |
| Non Smokers                 | 299 (33.0%)           | 232 (51.4%)              |         |
| Dyslipidaemia               | 224 (30.3%)           | 143 (35.3%)              | 0.083   |
| Previous MI                 | 126 (14.0%)           | 82 (17.8%)               | 0.061   |
| Chronic Lung Disease        | 25 (2.7%)             | 32 (6.6%)                | 0.001   |
| Cerebrovascular Disease     | 27 (2.9%)             | 21 (4.4%)                | 0.161   |
| Peripheral Vascular Disease | 8 (0.9%)              | 2 (0.4%)                 | 0.337   |
| Chronic Renal Disease       | 46 (5.0%)             | 54 (11.2%)               | <0.001  |

*PCI=percutaneous coronary intervention, MI=myocardial infarction*



**Table VII: Logistic Regression of Predictors for In-Hospital Mortality in Cardiogenic Shock.**

|                              | P Values     | Risk Ratios    | 95% C.I.for EXP(B)<br>Lower | Upper        |
|------------------------------|--------------|----------------|-----------------------------|--------------|
| <b>Age &gt;65</b>            | <b>0.000</b> | <b>2.470**</b> | <b>2.073</b>                | <b>2.944</b> |
| Dyslipidaemia                | 0.040        | 0.828          | .691                        | .992         |
| <b>Hypertension</b>          | <b>0.000</b> | <b>1.427**</b> | <b>1.180</b>                | <b>1.726</b> |
| <b>Diabetes Mellitus</b>     | <b>0.000</b> | <b>1.600**</b> | <b>1.343</b>                | <b>1.907</b> |
| Smoking status               | 0.000        | 0.675          | .567                        | .804         |
| Previous MI                  | 0.175        | 1.177          | .930                        | 1.490        |
| <b>Chronic Lung Disease</b>  | <b>0.032</b> | <b>1.744**</b> | <b>1.048</b>                | <b>2.903</b> |
| <b>Chronic Renal Disease</b> | <b>0.000</b> | <b>2.853**</b> | <b>2.079</b>                | <b>3.915</b> |
| Cerebrovascular disease      | 0.922        | 1.023          | .648                        | 1.615        |
| Peripheral vascular disease  | 0.256        | 0.410          | .088                        | 1.909        |
| Constant                     | 0.000        | 0.052          |                             |              |

\*\* statistically significant predictors of mortality , *MI=myocardial infarction*

**Table VIII: Length of Stay of CS vs non-CS Patients**

| Total day stay     | Cardiogenic shock | Non-cardiogenic shock | p-value |
|--------------------|-------------------|-----------------------|---------|
| Mean               | 8.17 (7.53, 8.82) | 5.21 (5.12, 5.29)     | 0.014   |
| Standard deviation | 11.561            | 5.102                 |         |

For peer review only

# BMJ Open

## The in-hospital mortality of cardiogenic shock complicating ST-elevation myocardial infarction in Malaysia: A retrospective analysis of the Malaysian National Cardiovascular Database (NCVD) registry.

|                                 |                                                                                                                                                                                                                                                                                                                                                                                                                                                                                                                                                                                   |
|---------------------------------|-----------------------------------------------------------------------------------------------------------------------------------------------------------------------------------------------------------------------------------------------------------------------------------------------------------------------------------------------------------------------------------------------------------------------------------------------------------------------------------------------------------------------------------------------------------------------------------|
| Journal:                        | <i>BMJ Open</i>                                                                                                                                                                                                                                                                                                                                                                                                                                                                                                                                                                   |
| Manuscript ID                   | bmjopen-2018-025734.R1                                                                                                                                                                                                                                                                                                                                                                                                                                                                                                                                                            |
| Article Type:                   | Research                                                                                                                                                                                                                                                                                                                                                                                                                                                                                                                                                                          |
| Date Submitted by the Author:   | 11-Jan-2019                                                                                                                                                                                                                                                                                                                                                                                                                                                                                                                                                                       |
| Complete List of Authors:       | Venkatasen, Padmaa; University of Malaya Medical Centre, Department of Medicine<br>Zubairi, Yong; University of Malaya, Foundation Studies in Science<br>Wan Ahmad, Wan; University of Malaya Faculty of Medicine, Department of Medicine<br>Hafidz, Muhammad; University of Malaya Medical Centre, Department of Medicine<br>Ismail, Muhammad Dzafir ; University of Malaya Medical Centre, Cardiology<br>Hadi, Muhammad; University of Malaya Medical Centre, Department of Medicine<br>Zuhdi, Ahmad Syadi Mahmood; University of Malaya Medical Centre, Department of Medicine |
| <b>Primary Subject Heading</b>: | Cardiovascular medicine                                                                                                                                                                                                                                                                                                                                                                                                                                                                                                                                                           |
| Secondary Subject Heading:      | Cardiovascular medicine                                                                                                                                                                                                                                                                                                                                                                                                                                                                                                                                                           |
| Keywords:                       | Adult cardiology < CARDIOLOGY, Ischaemic heart disease < CARDIOLOGY, Myocardial infarction < CARDIOLOGY, Coronary heart disease < CARDIOLOGY, Coronary intervention < CARDIOLOGY                                                                                                                                                                                                                                                                                                                                                                                                  |
|                                 |                                                                                                                                                                                                                                                                                                                                                                                                                                                                                                                                                                                   |

SCHOLARONE™  
Manuscripts

**Long Title:**

**The in-hospital mortality of cardiogenic shock complicating ST-elevation myocardial infarction in Malaysia: A retrospective analysis of the Malaysian National Cardiovascular Database (NCVD) registry.**

**Short title:**

**Cardiogenic shock complicating ST-elevation myocardial infarction in Malaysia**

**Authors:**

Padmaa Venkatasen<sup>1</sup>, Yong Z Zubairi<sup>2</sup>, Wan Azman Wan Ahmad<sup>1</sup>, Muhammad Imran Abdul Hafidz, <sup>1</sup>Muhammad Dzafir Ismail<sup>1</sup>, Mohd Firdaus Hadi<sup>1</sup>, Ahmad Syadi Mahmood Zuhdi<sup>1</sup>

1. Cardiology Unit, Medical Department, University Malaya Medical Centre, Kuala Lumpur, Malaysia
2. Foundation Studies in Science, University of Malaya, Faculty of Medicine, Kuala Lumpur, Wilayah Persekutuan, Malaysia

**Corresponding Author:**

1. Ahmad Syadi Mahmood Zuhdi

Cardiology Unit, Department of Medicine

University Malaya, 59100 Kuala Lumpur, Malaysia

E mail: syadizuhdi@yahoo.co.uk

Tel: +60 125058221

## Abstract

### Objectives:

Cardiogenic shock (CS) complicating ST-elevation myocardial infarction (STEMI) carries an extremely high mortality. The clinical pattern of this life threatening complication has never been described in Malaysian setting. This study is to investigate the incidence, clinical characteristics and outcome of STEMI patients with CS in our population

### Design:

A retrospective analysis of STEMI patients from 18 hospitals across Malaysia contributing to the Malaysian National Cardiovascular Database (Acute coronary syndrome) registry (NCVD-ACS) year 2006 to 2013

### Participants:

16,517 patients diagnosed of STEMI from 18 hospitals in Malaysia from the year 2006 to 2013.

### Primary Outcome Measures:

In-hospital and 30-day post discharge mortality

### Results:

CS complicates 10.6% of all STEMIs in this study. They had unfavorable premorbid conditions and poor outcomes. The in-hospital mortality rate was 34.1% which translates into a 7.14 times mortality risk increment compared to STEMI without cardiogenic shock. Intravenous thrombolysis remained as the main urgent reperfusion modality. Percutaneous

1  
2  
3 coronary interventions (PCI) in CS conferred a 40% risk reduction over non-invasive therapy  
4  
5 but were only done in 33.6% of cases. Age over 65, diabetes mellitus, hypertension, chronic  
6  
7 lung and kidney disease conferred higher risk of mortality.  
8  
9

### 10 11 12 13 14 15 **Conclusion:**

16  
17 Mortality rates of CS complicating STEMI in Malaysia are high. In-hospital PCI  
18  
19 confers a 40% mortality risk reduction but the rate of PCI among our patients with CS  
20  
21 complicating STEMI is still low. Efforts are being made to increase access to invasive  
22  
23 therapy for these patients.  
24  
25  
26  
27  
28  
29

30  
31 **Keywords:** Cardiogenic shock; myocardial infarction; percutaneous coronary intervention;  
32  
33 mortality; acute coronary syndrome  
34  
35  
36  
37

### 38 **STRENGTHS AND LIMITATIONS**

- 39  
40  
41  
42  
43  
44  
45  
46  
47  
48  
49  
50  
51  
52  
53  
54  
55  
56  
57  
58  
59  
60
- To our knowledge, this is the first study to describe the outcome of cardiogenic shock complicating STEMI in Malaysia
  - The analysis was done on a large data consisting 16517 patients from 18 hospitals across Malaysia. Hence it is so far the most representative of Malaysian population in general.
  - Patients were from multi-racial background representing the major racial groups in Asia ie Chinese, Indian and Malay
  - Confounding factors and inter-centre variations in terms of treatment and outcome from this retrospective study cannot be eliminated

- This study focuses on in-hospital mortality only. The long term outcome was not analyzed due to insufficient follow up data

## INTRODUCTION

Cardiogenic shock (CS) is an important cause of death in acute ST elevation myocardial infarction (STEMI) (1-3). Left ventricular dysfunction is the most common underlying aetiology in cardiogenic shock accounting for about 74.5% of cases (4,5). There is correlation with the severity of coronary artery disease whereby CS is strongly associated with triple vessel or left main stem coronary involvement (6)

Despite the advancement in reperfusion therapy with invasive percutaneous coronary intervention (PCI), the mortality rate remains high. The in-hospital mortality rate even after successful PCI is reported to be as high as 40% (7-9). Although the incidence of CS complicating myocardial infarctions is only around 4% to 10% (1,10), it remains a big challenge in terms of clinical management.

Due to various limitations locally, the rate of coronary reperfusion with primary PCI in STEMI is only about 7% in Malaysia (11). Given the restriction in delivering the preferred revascularization therapy (primary PCI), the outcome of CS complicating myocardial infarctions in our population has yet been fully described and no comparison ever made with other studies. Hence, we utilize data from the Malaysian National Cardiovascular Database – Acute coronary syndrome 2006 to 2013 (NCVD-ACS 2006 to 2013) to investigate the characteristics and outcome of CS complicating STEMIs in Malaysia.

## METHODS:

### Patient population

A total of 16,517 patients diagnosed with STEMI were identified from the Malaysian National Cardiovascular Database- Acute coronary syndrome (NCVD-ACS) from year 2006 to 2013. The NCVD is a national registry involving 18 hospitals nationally. It captures clinical data on all patients admitted with acute coronary syndromes. The Ministry of Health (MOH) Malaysia and the National Heart Association of Malaysia (NHAM) sponsor the registry. Data is collected upon admission and throughout the patient stay using a standardized case reporting form. A unique national identification number is given to each patient to avoid duplication. Parameters recorded include baseline characteristics and clinical presentation, in-hospital treatment, procedural details and clinical outcome.

STEMI is defined as a persistent ST-segment elevation of  $\geq 1$  mm in two contiguous electrocardiographic leads or the presence of a new left bundle branch block in the setting of positive cardiac markers and/or typical cardiac pain. Patients were divided into 2 groups based on their Killip class on presentation. Those in Killip class IV were grouped under 'cardiogenic shock' (n=1753) while those in Killip class I, II and III were grouped under 'non-cardiogenic shock' (n=14764). The 2 groups were compared in terms of clinical characteristics, in-hospital invasive treatment, pharmacotherapy and all cause in-hospital mortality. A cross check with the national death registry was also done to verify the patients' mortality status.

The results of the study will be made public in National Heart Association of Malaysia website through the National Cardiovascular Disease Database (NCVD) annual



1  
2  
3 reports in interest for the view of the participants. In this study we use retrospective cohort  
4  
5 studies looking at data that has already been existing.  
6

### 7 8 **Definition of Killip class**

9  
10 Killip class IV is defined as the presence of hypotension with a systolic BP lower than  
11  
12 90mmHg and evidence of peripheral vasoconstriction. Below are the definitions of the other  
13  
14 Killip classes:  
15

16  
17 Killip I: No clinical signs of heart failure,  
18

19 Killip II: Presence of rales or crepitation in the lungs bases only or a third heart sound (S3),  
20

21 Killip III: Presence of frank acute pulmonary oedema  
22

23  
24 Killip IV: Cardiogenic shock or hypotension (measured as systolic blood pressure < 90  
25  
26 mmHg), and evidence of peripheral vasoconstriction  
27  
28  
29

### 30 31 **Statistical analysis**

32  
33 Categorical variables were described as numbers and percentages. The differences  
34  
35 were analysed by chi-square test or Fisher exact test. Continuous variables were expressed as  
36  
37 median and differences were analysed using t-test. To avert biases in the estimates and loss of  
38  
39 power, missing data for explanatory variables were assumed to be missing at random. A  
40  
41 generalized linear model with a log link, binomial distribution, and a robust variance  
42  
43 estimator was used to estimate the risk ratios. The risk ratios represent the relative risk for  
44  
45 mortality of the non-cardiogenic shock group compared to the cardiogenic shock group.  
46  
47 Subsequently, risk ratios of CS patients with PCI done and without PCI were also compared.  
48  
49 Variables that were statistically significantly different (a 2-sided P value of less than 0.05)  
50  
51 between the CS and non-CS patients, that were of clinical importance, and that had sufficient  
52  
53 outcomes in the respective subcategories were adjusted for. Finally, binary logistics  
54  
55 regression was executed to determine the independent predictors of in-hospital mortality  
56  
57  
58  
59  
60

1  
2  
3 among CS patients. All analyses were conducted using SPSS statistical software (version 21,  
4 IBM SPSS Statistics, USA).  
5  
6

### 7 **Patient and public involvement**

8  
9  
10 There is no patient or public involvement in the development of this study's research question  
11 and outcome. All data was obtained retrospectively from the Malaysian National  
12 Cardiovascular Database Registry – Acute Coronary Syndrome (NCVD-ACS).  
13  
14  
15  
16  
17  
18

### 19 **RESULTS:**

20  
21 Table I illustrates the comparison in baseline characteristics between the CS and non-  
22 CS group. A total of 1753 out of 16517 patients (10.6%) presented with CS.  
23  
24 Demographically, the CS group contained more patients over the age of 65 (28.6% Vs 22.6%  
25 P<0.001). Females and Malay ethnic groups were also seen to be significantly more prevalent  
26 in the cardiogenic shock group. In terms of cardiovascular risk factors, they had higher rate  
27 of diabetes and hypertension but unexpectedly lower rate of smoking, hyperlipidaemia and  
28 premature family history. Other related premorbid conditions were unfavourable to the CS  
29 group where they had higher rate of previous MI, cerebrovascular, peripheral vascular,  
30 chronic kidney and chronic lung diseases.  
31  
32  
33  
34  
35  
36  
37  
38  
39  
40  
41  
42  
43  
44

45 Table II compares the revascularisation treatment between the 2 groups. Intravenous  
46 thrombolysis remained the main emergency reperfusion therapy for both CS and non-CS  
47 patients. Although there was no significant difference of symptom to door times between the  
48 2 groups, the door to needle time was significantly shorter for CS patients (45 minutes vs. 60  
49 minutes P <0.001). The difference in the rate of primary PCIs between the 2 groups was  
50 small (11.7% CS vs. 10.0% non-CS). Total rate of in-hospital PCIs (inclusive of primary  
51 PCIs) was however significantly higher in CS patients (33.6% vs. 29.5% P=0.001). Table III  
52  
53  
54  
55  
56  
57  
58  
59  
60

1  
2  
3 shows the administrative rate of evidence-based pharmacotherapy during the admission,  
4 which favoured the non-CS patients across all class of medications especially  
5 antihypertensives.  
6  
7  
8  
9

10  
11  
12 Table IV compares the all cause in-hospital mortality rate between patients with CS  
13 and non-CS. The mortality rate was different between the 2 groups (34.1% CS vs. 5.6% non-  
14 CS, P value <0.001) After multivariate adjustment of confounding factors, we found that the  
15 CS group had 7.14 times higher mortality risk compared to the non-CS group.  
16  
17  
18  
19  
20  
21  
22  
23

24 Mortality data was obtained from official records from the National Registration  
25 Department of Malaysia and cross-referenced to patients, however we were unable to get  
26 information for 29 patients (0.017%) in the CS group for undetermined reasons. Table V sub-  
27 analyses the in-hospital mortality rates among CS patients. Those who had PCI done during  
28 the admission had a lower rate of in-hospital mortality (27.0% vs. 38.9%) compared to those  
29 who did not. Adjusted mortality risk ratio showed that there was a 40% mortality risk  
30 reduction in those with PCI done.  
31  
32  
33  
34  
35  
36  
37  
38  
39  
40  
41

42 Table VI shows univariate analysis of clinical variables related to mortality in the CS  
43 group. All variables that were statistically significant from this table were then grouped into a  
44 multivariate logistic regression to determine the independent predictors of in-hospital  
45 mortality within the CS group. The result of the multivariate logistic regression is tabulated in  
46 Table VII. We found that the presence of hypertension, diabetes mellitus, chronic lung and  
47 kidney diseases, and age of over 65 carried statistically significantly higher mortality risks  
48 and hence they seem to be independent predictors of in-hospital mortality. Table VIII shows  
49  
50  
51  
52  
53  
54  
55  
56  
57  
58  
59  
60

1  
2  
3 the length of stay between the two groups. Patients with CS have significantly longer  
4  
5 duration of inpatient stay compared to non-CS.  
6  
7  
8  
9  
10  
11

## 12 **DISCUSSION:**

13  
14       Cardiogenic shock (CS) is a clinical state where cardiac dysfunction results in  
15  
16 inadequate tissue perfusion. CS is characterised by a state of haemodynamic insufficiency  
17  
18 that may involve hypotension (systolic blood pressure <90 mmHg), significant decrease in  
19  
20 mean arterial pressure (MAP) from baseline, and reduced cardiac index. CS can be  
21  
22 multifactorial but most commonly occurs secondary to myocardial infarction (MI).  
23  
24  
25  
26  
27

28  
29       CS complicating a myocardial infarction more commonly occurs in ST elevation  
30  
31 myocardial infarctions compared to non-ST elevation myocardial infarctions and is a  
32  
33 predictor of poor prognosis. Data from our NCVD registry showed in-hospital mortality rates  
34  
35 of 34.1%. This figure is lower than other MI registries and trials such as the SHOCK trial,  
36  
37 which reported in hospital mortality rates of at least 48%. Reasons for the lower figures are  
38  
39 unclear, but may be contributed to by a common practice of early hospital discharging of  
40  
41 STEMI patients, which may not capture data on patients who died at home early after  
42  
43 discharge that would be reflected in 30-day outcomes if this data was available.  
44  
45  
46  
47  
48

49       Preexisting conditions including hypertension, diabetes mellitus, chronic kidney and  
50  
51 lung disease conferred a higher risk of death in our patients, which may reflect poor pre-  
52  
53 hospital reserve that is ill prepared to cope with a major stressor such as cardiogenic shock.  
54  
55 Increasing age was also a predictor of mortality in our cohort with adults over 65 years of age  
56  
57 more than twice more likely to die in hospital if they had CS complicating a STEMI. Age was  
58  
59  
60

1  
2  
3 also found in another study to be the parameter most strongly associated with developing  
4 cardiogenic shock after a myocardial infarction with every 10-year increase in age the risk of  
5 developing shock was greater by 47%(12). We observed an interesting finding of  
6  
7 significantly lower rates of smoking, family history and dyslipidaemia in the CS group. It is  
8 not clear whether this represents under-reporting or under-diagnosis of risk factors or these  
9 are paradoxical risk factors for developing CS in STEMI in our population. Nonetheless,  
10 further studies would be appropriate to investigate this further, perhaps with future data from  
11  
12  
13  
14  
15  
16  
17  
18  
19  
20  
21  
22  
23  
24  
25  
26  
27  
28  
29  
30  
31  
32  
33  
34  
35  
36  
37  
38  
39  
40  
41  
42  
43  
44  
45  
46  
47  
48  
49  
50  
51  
52  
53  
54  
55  
56  
57  
58  
59  
60  
NCVD.

Data shows that cardiogenic shock patients in the setting of acute myocardial infarction who were treated non-invasively had poorer outcome and primary PCI is superior to thrombolytic therapy (12-16). Similar to other registries and studies, our data showed improved survival for patients who underwent in-hospital PCI including primary PCI (12). The adjusted risk of death was reduced by 40% for patients who received PCI during the index admission compared to those who did not. Intravenous thrombolysis remains the most frequent mode of achieving reperfusion in Malaysia due to several factors. PCI in Malaysia is more costly than thrombolysis and primary or urgent PCI services are limited to patients presenting to one of several PCI centres or their network hospitals, which explains why around only 10% of patients received primary PCI. Nonetheless, in the SHOCK trial, thrombolysis was superior to medical therapy only and is recommended in many guidelines as a reperfusion strategy when PCI is not possible or delayed, particularly when patients present within 3 hours of symptoms (17). We did not have any data on intra-aortic balloon pump or assist devices in our patients in this registry. Our data showed a shorter door to needle time in patients presenting with CS compared to non-CS. We postulate several factors - CS patients would be appear more ill during initial assessment and the presence of

1  
2  
3 hypotension would likely push for more urgent and swift diagnostic and management steps.  
4  
5 In our personal experience, patients with non-CS STEMI may also present in atypical ways  
6  
7 that may delay or make assessment less urgent, hence explain the longer door to needle time.  
8  
9  
10 Ideally we would have included the door to balloon data for comparison, however that data is  
11  
12 contained in a separate registry called the NCVD-PCI registry, which we did not have access  
13  
14  
15 to.

16  
17  
18  
19 Efforts are being made to increase coverage of primary PCI through the development  
20  
21 of a hub and spoke model for ST elevation myocardial infarctions called the MySTEMI  
22  
23 Network. Non-PCI centres (hub) are paired with a PCI capable centre (spoke) whereby  
24  
25 patients presenting to a non-PCI hospital with a STEMI are transferred to a PCI centre for  
26  
27 primary PCI (18). We hope that with the rolling out of this MySTEMI Network nationally,  
28  
29 we are able to offer PCI as the main reperfusion modality for STEMI patients. Efforts are  
30  
31 also being made to improve prescribing rates of evidence-based therapy through clinical  
32  
33 audits and CME sessions. There was a low rate of antiplatelet prescription particularly in the  
34  
35 CS group, which has been noted in other local studies (11,19). Although the exact reasons to  
36  
37 explain the low prescription rates in our population were not detailed in the NCVD registry,  
38  
39 one factor could be the increased bleeding rates in patients with CS (20). We recognise that  
40  
41 although our findings are based on the NCVD data, these may not be truly representative of  
42  
43 the current situation. The current NCVD is incomplete as there are still several hospitals that  
44  
45 are not yet fully contributing towards NCVD data; efforts are however being taken to  
46  
47 improve this. Increased reporting will only improve the accuracy of future studies and allow  
48  
49 better allocation of resources in improving outcomes.  
50  
51  
52  
53  
54  
55  
56  
57  
58  
59  
60

## CONCLUSION:

CS complicated STEMI in about 10.6% of our patients. The in-hospital mortality was high (34.1%) and invasive coronary revascularisation lowered the mortality rate substantially. Similar to other studies, multiple comorbidities including increased age were predictors of poor prognosis. Greater effort is needed to improve outcomes and increased effort is being made to improve the rate of primary and in-hospital PCI.

## ACKNOWLEDEMENT

We would like to thank all the medical and non-medical personnel involved in the data collection and analysis of the National Cardiovascular Disease – Acute coronary syndrome (NCVD-ACS) registry. We also would like to convey our gratitude to the patients' advisers.

## CONTRIBUTORS

Original idea of the study originated from ASMZ. PV, YZZ and ASMZ designed the study. WAWA, MIAH, MFH and MDI wrote the initial draft of the manuscript. PV, MIAH, MFH, YZZ, WAWA and MDI analysed the data and revised the manuscript. All authors interpreted the data analysis and scrutinized the final manuscript.

## FUNDING

This research received no specific grant from any funding agency in the public, commercial or not-for-profit sectors.

1  
2  
3  
4  
5 **COMPETING INTERESTS**  
6

7  
8 None declared.  
9

10  
11  
12 **PATIENT CONSENT**  
13

14  
15 Not required.  
16

17  
18  
19 **ETHICS APPROVAL**  
20

21 The NCVD registry study was approved by the Medical Review & Ethics Committee  
22 (MREC), Ministry Of Health (MOH) Malaysia in 2007 (Approval Code: NMRR-07-20-250).  
23

24  
25 MREC waived informed consent for NCVD.  
26  
27

28  
29  
30 **DATA AVAILABILITY STATEMENT**  
31

32  
33 No data are available  
34  
35

36  
37  
38 **PROVENANCE AND PEER REVIEW**  
39

40 Not commissioned; externally reviewed.  
41  
42  
43  
44  
45  
46  
47  
48  
49  
50  
51  
52  
53  
54  
55  
56  
57  
58  
59  
60



**REFERENCES:**

1. Awad H, Anderson F, Gore J, Goodman S, Goldberg R. Cardiogenic shock complicating acute coronary syndromes: Insights from the Global Registry of Acute Coronary Events. *American Heart Journal*. 2012;163(6):963-971.
2. Menon V. MANAGEMENT OF CARADIOGENIC SHOCK COMPLICATING ACUTE MYOCARDIAL INFARCTION. *Heart*. 2002;88(5):531-537.
3. Goldberg R, Samad N, Yarzebski J, Gurwitz J, Bigelow C, Gore J. Temporal Trends in Cardiogenic Shock Complicating Acute Myocardial Infarction. *New England Journal of Medicine*. 1999;340(15):1162-1168.
4. Hochman JS, Boland J, Sleeper LA, et al. Current spectrum of cardiogenic shock and effect of early revascularisation on mortality. Results of an international registry. SHOCK registry investigators. *Circulation*. 1995;91:873–81
5. Hochman JS, Buller CE, Sleeper LA, et al. Cardiogenic shock complicating acute myocardial infarction: etiologies, management and outcome: a report from the SHOCK trial registry. *J Am Coll Cardiol*. 2000;36:1063–70
6. Sanborn TA, Sleeper LA, Webb JG, et al. Correlates of one-year survival in patients with cardiogenic shock complicating acute myocardial infarction: angiographic findings from the SHOCK trial. *J Am Coll Cardiol*. 2003;42:1373–9
7. Holmes D, Berger P, Hochman J, Granger C, Thompson T, Califf R et al. Cardiogenic Shock in Patients With Acute Ischemic Syndromes With and Without ST-Segment Elevation. *Circulation*. 1999;100(20):2067-2073.
8. Urban P. A randomized evaluation of early revascularization to treat shock complicating acute myocardial infarction. The (Swiss) Multicenter Trial of Angioplasty for Shock—(S)MASH. *European Heart Journal*. 1999;20(14):1030-1038.

- 1  
2  
3 9. Stauffer JC, Urban P, Bleed D, et al. Result of the “Swiss” multicenter evaluation of  
4  
5 early angioplasty for shock following myocardial infarction. *Circulation*.  
6  
7 1997;96(Suppl 1):I-209  
8  
9
- 10 10. Braunwald EB. Hemodynamic disturbances in acute myocardial infarction. In:  
11  
12 Braunwald EB, editor. *Heart disease*. Philadelphia: W.B. Saunders; 1997: 1233-45.  
13
- 14 11. Zuhdi A, Ahmad W, Zaki R, Mariapun J, Ali R, Sari N et al. Acute coronary  
15  
16 syndrome in the elderly: the Malaysian National Cardiovascular Disease Database-  
17  
18 Acute Coronary Syndrome registry. *Singapore Medical Journal*. 2016;57(04):191-  
19  
20 197.  
21  
22
- 23 12. Hasdai D, Califf R, Thompson T, Hochman J, Ohman E, Pfisterer M et al. Predictors  
24  
25 of cardiogenic shock after thrombolytic therapy for acute myocardial infarction.  
26  
27 *Journal of the American College of Cardiology*. 2000;35(1):136-143.  
28  
29
- 30 13. Lindholm M. Cardiogenic shock complicating acute myocardial infarction Prognostic  
31  
32 impact of early and late shock development. *European Heart Journal*. 2003;24(3):258-  
33  
34 265.  
35  
36
- 37 14. Chou T, Amidon T, Ports T, Wolfe C. Cardiogenic Shock: Thrombolysis or  
38  
39 Angioplasty?. *Journal of Intensive Care Medicine*. 1996;11(1):37-48.  
40  
41
- 42 15. Bates E, Topol E. Limitations of thrombolytic therapy for acute myocardial infarction  
43  
44 complicated by congestive heart failure and cardiogenic shock. *Journal of the*  
45  
46 *American College of Cardiology*. 1991;18(4):1077-1084.  
47  
48
- 49 16. Hochman J, Sleeper L, Webb J, Sanborn T, White H, Talley J et al. Early  
50  
51 Revascularization in Acute Myocardial Infarction Complicated by Cardiogenic  
52  
53 Shock. *New England Journal of Medicine*. 1999;341(9):625-634.  
54  
55  
56  
57  
58  
59  
60

17. French J, Feldman H, Assmann S, Sanborn T, Palmeri S, Miller D et al. Influence of thrombolytic therapy, with or without intra-aortic balloon counterpulsation, on 12-month survival in the SHOCK trial. *American Heart Journal*. 2003;146(5):804-810.
18. Malaysian Heart [Online]. Available at: <https://www.malaysianheart.org>. Accessed 9 February 2017.
19. Lu H, Nordin R. Ethnic differences in the occurrence of acute coronary syndrome: results of the Malaysian National Cardiovascular Disease (NCVD) Database Registry (March 2006 - February 2010). *BMC Cardiovascular Disorders*. 2013;13(1).
20. Gilchrist I, Rao S. Improving outcomes in patients with cardiogenic shock: Achieving more through less. *American Heart Journal*. 2013;165(3):256-257.

## **TABLES**

**Table I: Baseline Characteristics of Patients with ST-Elevation Myocardial Infarction**

|                             | CS (Killip IV)<br>(n= 1753) | Non-CS (Killip I to III) ( n=14764) | P – value |
|-----------------------------|-----------------------------|-------------------------------------|-----------|
| Age:                        |                             |                                     |           |
| 64 years or less            | 1214 (71.4%)                | 11141 (77.4%)                       | <0.001    |
| >65                         | 486 (28.6%)                 | 3252 (22.6%)                        |           |
| Gender                      |                             |                                     |           |
| Male                        | 1455 (83.0%)                | 12687 (85.9%)                       | 0.001     |
| Female                      | 298 (17.0%)                 | 2077 (14.1%)                        |           |
| Ethnicity                   |                             |                                     |           |
| Malay                       | 1113 (63.5%)                | 8631 (58.5%)                        | 0.001     |
| Chinese                     | 285 (16.3%)                 | 2632 (17.8%)                        |           |
| Indian                      | 247 (14.1%)                 | 2466 (16.7%)                        |           |
| Others                      | 108 (6.2%)                  | 1035 (7.0%)                         |           |
| Risk Factors                |                             |                                     |           |
| Smoking (active/ex)         | 1109 (67.4%)                | 10020 (70.0%)                       | 0.028     |
| Diabetes                    | 732 (51.3%)                 | 5257 (42.3%)                        | <0.001    |
| Hypertension                | 891 (61.3%)                 | 7270 (57.2%)                        | 0.002     |
| Hyperlipidaemia             | 372 (32.1%)                 | 3754 (35.3%)                        | 0.030     |
| Family history              | 158 (9.0%)                  | 1658 (11.2%)                        | <0.001    |
| Premorbids                  |                             |                                     |           |
| Cerebrovascular             | 49 (3.4%)                   | 386 (3.1%)                          | 0.422     |
| Previous MI                 | 208 (15.1%)                 | 1553 (12.6%)                        | 0.009     |
| Peripheral vascular disease | 10 (0.7%)                   | 35 (0.3%)                           | 0.007     |

|                                                       |               |               |        |
|-------------------------------------------------------|---------------|---------------|--------|
| Chronic kidney disease                                | 100 (7.1%)    | 461 (3.7%)    | <0.001 |
| Chronic lung disease                                  | 58 (4.1%)     | 285 (2.3%)    | <0.001 |
| Myocardial infarct type                               |               |               |        |
| Inferior infarct                                      | 732 (41.8%)   | 5310 (36.0%)  | <0.001 |
| Anterior infarct                                      | 743 (42.4%)   | 6772 (45.9%)  | 0.001  |
| Left ventricular ejection fraction (LVEF) mean +/- SD | 38.7 +/- 12.2 | 46.1 +/- 11.1 | 0.025  |

MI=Myocardial Infarction, CS = Cardiogenic Shock, Non-CS = Non-Cardiogenic Shock

**Table II: Coronary reperfusion and revascularisation therapy in STEMI patients who have CS and do not have CS.**

|                                                | CS STEMI          | Non-CS STEMI      | p-value |
|------------------------------------------------|-------------------|-------------------|---------|
| Thrombolysis Given                             | 1216 (71.4%)      | 10885 (75.2%)     | <0.001  |
| Not given – proceeded to primary angioplasty   | 199 (11.7%)       | 1451 (10.0%)      |         |
| Not given – missed                             | 129 (7.6%)        | 1690 (11.7%)      |         |
| Not given – patient refusal                    | 4 (0.2%)          | 49 (0.3%)         |         |
| Not given – contraindicated                    | 156(9.2%)         | 391 (2.7%)        |         |
| In-Hospital PCI*                               | 537 (33.6%)       | 4083 (29.5%)      | 0.001   |
| Door to needle time for thrombolysis (minutes) | 45.0              | 60.0              | <0.001  |
| Symptom to door time (minutes)                 | 249.98 +/- 224.74 | 239.34 +/- 215.37 | 0.074   |

PCI= percutaneous coronary intervention, CS=Cardiogenic Shock, STEMI=ST Elevation Myocardial Infarction. In-Hospital PCI\*= Defined as PCI done during index admission that was not Primary Angioplasty – includes rescue PCI, pharmacoinvasive PCI and early routine PCI.

**Table III: In hospital pharmacotherapy**

| Medications    | CS STEMI (n= 1753) | Non-CS STEMI (n= 14764) | p-value |
|----------------|--------------------|-------------------------|---------|
| Aspirin        | 1024 (75.7%)       | 12470 (93.3%)           | <0.001  |
| ADP-antagonist | 632 (67.8%)        | 8346 (81.4%)            | <0.001  |
| ACE-I/ARB      | 529 (30.3%)        | 8128 (55.8%)            | <0.001  |
| Beta Blocker   | 659 (51.1%)        | 9185 (71.5%)            | <0.001  |
| Statin         | 957 (70.9%)        | 12024 (90.5%)           | <0.001  |

ADP= Adenosine diphosphate, ACE-I=angiotensin converting enzyme inhibitor, ARB= Angiotensin Receptor Blocker, CS=Cardiogenic Shock, STEMI=ST Elevation Myocardial Infarction

**Table IV: In-hospital and 30-day mortality rates.**

|                        | No of patients | Death (%)   | Unadjusted risk ratio | Adjusted risk ratio   | P-value |
|------------------------|----------------|-------------|-----------------------|-----------------------|---------|
| In-hospital mortality: |                |             |                       |                       |         |
| CS                     | 1753           | 598 (34.1%) | 6.827 (6.104, 7.954)  | 7.143 (6.365, 8.017)  | <0.001  |
| Non-CS                 | 14764          | 821 (5.6%)  | 1                     | 1                     |         |
| 30-day mortality:      |                |             |                       |                       |         |
| CS                     | 1753           | 634 (36.2%) | 7.587 (7.002, 9.552)  | 8.863 (7.848, 10.009) | <0.001  |
| Non-CS                 | 14764          | 1085 (7.3%) | 1                     | 1                     |         |

CS=Cardiogenic Shock, STEMI=ST Elevation Myocardial

**Table V: Comparison of Mortality Rates between Cardiogenic Shock with or without PCI**

| In Hospital mortality | No. of patients | Death (%)   | Unadjusted risk ratio | Adjusted risk ratio | P values |
|-----------------------|-----------------|-------------|-----------------------|---------------------|----------|
| PCI done              | 537             | 145 (27%)   | 0.535 (0.428, 0.670)  | 0.600               | P<0.001  |
| PCI not done          | 1063            | 414 (38.9%) | 1                     | (0.513,0.700)       |          |

PCI= percutaneous coronary intervention

**Table VI: Comparison of Clinical Factors between Survivors and Non-survivors of Cardiogenic Shock.**

|                             | Survivors (n=1126) | Non-survivors (n=598) | P value |
|-----------------------------|--------------------|-----------------------|---------|
| Age >65                     | 226 (20.8%)        | 253 (43.1%)           | <0.001  |
| Diabetes                    | 429 (47.5%)        | 295 (58.2%)           | <0.001  |
| Hypertension                | 520 (56.5%)        | 361 (70.4%)           | <0.001  |
| Smoking status              |                    |                       |         |
| Active/Ex Smokers           | 607 (67.0%)        | 219 (48.6%)           | <0.001  |
| Non Smokers                 | 299 (33.0%)        | 232 (51.4%)           |         |
| Dyslipidaemia               | 224 (30.3%)        | 143 (35.3%)           | 0.083   |
| Previous MI                 | 126 (14.0%)        | 82 (17.8%)            | 0.061   |
| Chronic Lung Disease        | 25 (2.7%)          | 32 (6.6%)             | 0.001   |
| Cerebrovascular Disease     | 27 (2.9%)          | 21 (4.4%)             | 0.161   |
| Peripheral Vascular Disease | 8 (0.9%)           | 2 (0.4%)              | 0.337   |
| Chronic Renal Disease       | 46 (5.0%)          | 54 (11.2%)            | <0.001  |

1  
2  
3 *PCI=percutaneous coronary intervention, MI=myocardial infarction*  
4  
5  
6

7 **Table VII: Logistic Regression of Predictors for In-Hospital Mortality in Cardiogenic**  
8 **Shock.**

|                              | P Values     | Risk Ratios    | 95% C.I. for EXP(B) |              |
|------------------------------|--------------|----------------|---------------------|--------------|
|                              |              |                | Lower               | Upper        |
| <b>Age &gt;65</b>            | <b>0.000</b> | <b>2.470**</b> | <b>2.073</b>        | <b>2.944</b> |
| Dyslipidaemia                | 0.040        | 0.828          | .691                | .992         |
| <b>Hypertension</b>          | <b>0.000</b> | <b>1.427**</b> | <b>1.180</b>        | <b>1.726</b> |
| <b>Diabetes Mellitus</b>     | <b>0.000</b> | <b>1.600**</b> | <b>1.343</b>        | <b>1.907</b> |
| Smoking status               | 0.000        | 0.675          | .567                | .804         |
| Previous MI                  | 0.175        | 1.177          | .930                | 1.490        |
| <b>Chronic Lung Disease</b>  | <b>0.032</b> | <b>1.744**</b> | <b>1.048</b>        | <b>2.903</b> |
| <b>Chronic Renal Disease</b> | <b>0.000</b> | <b>2.853**</b> | <b>2.079</b>        | <b>3.915</b> |
| Cerebrovascular disease      | 0.922        | 1.023          | .648                | 1.615        |
| Peripheral vascular disease  | 0.256        | 0.410          | .088                | 1.909        |
| Constant                     | 0.000        | 0.052          |                     |              |

9  
10  
11  
12  
13  
14  
15  
16  
17  
18  
19  
20  
21  
22  
23  
24  
25  
26  
27  
28  
29  
30  
31 \*\* statistically significant predictors of mortality , *MI=myocardial infarction*  
32  
33

34 **Table VIII: Length of Stay of CS vs non-CS Patients**

| Total day stay     | Cardiogenic shock | Non-cardiogenic shock | p-value |
|--------------------|-------------------|-----------------------|---------|
| Mean               | 8.17 (7.53, 8.82) | 5.21 (5.12, 5.29)     | 0.014   |
| Standard deviation | 11.561            | 5.102                 |         |

1  
2  
3  
4  
5  
6  
7  
8  
9  
10  
11  
12  
13  
14  
15  
16  
17  
18  
19  
20  
21  
22  
23  
24  
25  
26  
27  
28  
29  
30  
31  
32  
33  
34  
35  
36  
37  
38  
39  
40  
41  
42  
43  
44  
45  
46  
47  
48  
49  
50  
51  
52  
53  
54  
55  
56  
57  
58  
59  
60

For peer review only

## STROBE Statement—checklist of items that should be included in reports of observational studies

|                           | Item No | Recommendation                                                                                                                                                                                                                                                                                                                                                                                                                                                                                                                                                                                                                                                                                                                                                                                                                                                                                                                                                               |
|---------------------------|---------|------------------------------------------------------------------------------------------------------------------------------------------------------------------------------------------------------------------------------------------------------------------------------------------------------------------------------------------------------------------------------------------------------------------------------------------------------------------------------------------------------------------------------------------------------------------------------------------------------------------------------------------------------------------------------------------------------------------------------------------------------------------------------------------------------------------------------------------------------------------------------------------------------------------------------------------------------------------------------|
| <b>Title and abstract</b> | 1       | <p>(a) Indicate the study's design with a commonly used term in the title or the abstract<br/><b>Retrospective analysis of a registry data (Page 1)</b></p> <p>(b) Provide in the abstract an informative and balanced summary of what was done and what was found<br/><b>Done – refer abstract (Page 2)</b></p>                                                                                                                                                                                                                                                                                                                                                                                                                                                                                                                                                                                                                                                             |
| <b>Introduction</b>       |         |                                                                                                                                                                                                                                                                                                                                                                                                                                                                                                                                                                                                                                                                                                                                                                                                                                                                                                                                                                              |
| Background/rationale      | 2       | <p>Explain the scientific background and rationale for the investigation being reported<br/><b>Cardiogenic shock carries the worse prognosis in STEMI and has never been fully described in the setting of Malaysian population. (Page 4)</b></p>                                                                                                                                                                                                                                                                                                                                                                                                                                                                                                                                                                                                                                                                                                                            |
| Objectives                | 3       | <p>State specific objectives, including any prespecified hypotheses<br/><b>To investigate the mortality of cardiogenic shock complicating STEMI in Malaysian setting where the utility of percutaneous coronary intervention is still sub optimal (page 4)</b></p>                                                                                                                                                                                                                                                                                                                                                                                                                                                                                                                                                                                                                                                                                                           |
| <b>Methods</b>            |         |                                                                                                                                                                                                                                                                                                                                                                                                                                                                                                                                                                                                                                                                                                                                                                                                                                                                                                                                                                              |
| Study design              | 4       | <p>Present key elements of study design early in the paper<br/><b>Retrospective analysis of Malaysian National Cardiovascular Database – Acute coronary syndrome 2006 to 2013 (NCVD-ACS). Observational study. (page 5)</b></p>                                                                                                                                                                                                                                                                                                                                                                                                                                                                                                                                                                                                                                                                                                                                              |
| Setting                   | 5       | <p>Describe the setting, locations, and relevant dates, including periods of recruitment, exposure, follow-up, and data collection<br/><b>We include all patients diagnosed of STEMI in 18 hospitals across Malaysia from the year 2006 to 2013. Patients were followed up for 30-days post discharge (page 5)</b></p>                                                                                                                                                                                                                                                                                                                                                                                                                                                                                                                                                                                                                                                       |
| Participants              | 6       | <p>(a) <i>Cohort study</i>—Give the eligibility criteria, and the sources and methods of selection of participants. Describe methods of follow-up<br/><b>Anonymous patients' data from the NCVD-ACS registry from 18 hospitals in Malaysia. Follow up on all-cause mortality done via telephone calls and cross-checked with the national death register of Malaysia. (page 5)</b></p> <p><i>Case-control study</i>—Give the eligibility criteria, and the sources and methods of case ascertainment and control selection. Give the rationale for the choice of cases and controls</p> <p><i>Cross-sectional study</i>—Give the eligibility criteria, and the sources and methods of selection of participants</p> <p>(b) <i>Cohort study</i>—For matched studies, give matching criteria and number of exposed and unexposed<br/><b>Done (page 5)</b></p> <p><i>Case-control study</i>—For matched studies, give matching criteria and the number of controls per case</p> |
| Variables                 | 7       | <p>Clearly define all outcomes, exposures, predictors, potential confounders, and effect modifiers. Give diagnostic criteria, if applicable<br/><b>We analysed in-hospital mortality and 30-day mortality of patients presented with STEMI with and without cardiogenic shock. Clinical baseline characteristics and in-hospital treatment were analysed and adjusted for towards the outcome (mortality) (page 5)</b></p>                                                                                                                                                                                                                                                                                                                                                                                                                                                                                                                                                   |



|                                                                                                                                                                                              |                              |    |                                                                                                                                                                                                                                                                                                                                                                                                                                                                                                                                                                                                                                                                                                                                                                                                                                                                                                                                                                                                                                                                                                                                                                                                                                                                                                                                                                                                                                                                                                                                                                                                                                                                                                                                                                                                                                    |
|----------------------------------------------------------------------------------------------------------------------------------------------------------------------------------------------|------------------------------|----|------------------------------------------------------------------------------------------------------------------------------------------------------------------------------------------------------------------------------------------------------------------------------------------------------------------------------------------------------------------------------------------------------------------------------------------------------------------------------------------------------------------------------------------------------------------------------------------------------------------------------------------------------------------------------------------------------------------------------------------------------------------------------------------------------------------------------------------------------------------------------------------------------------------------------------------------------------------------------------------------------------------------------------------------------------------------------------------------------------------------------------------------------------------------------------------------------------------------------------------------------------------------------------------------------------------------------------------------------------------------------------------------------------------------------------------------------------------------------------------------------------------------------------------------------------------------------------------------------------------------------------------------------------------------------------------------------------------------------------------------------------------------------------------------------------------------------------|
| 1<br>2<br>3<br>4<br>5<br>6                                                                                                                                                                   | Data sources/<br>measurement | 8* | For each variable of interest, give sources of data and details of methods of assessment (measurement). Describe comparability of assessment methods if there is more than one group<br><br>Clinical variables were extracted from the NCVD-ACS registry (page 5)                                                                                                                                                                                                                                                                                                                                                                                                                                                                                                                                                                                                                                                                                                                                                                                                                                                                                                                                                                                                                                                                                                                                                                                                                                                                                                                                                                                                                                                                                                                                                                  |
| 7<br>8<br>9<br>10                                                                                                                                                                            | Bias                         | 9  | Describe any efforts to address potential sources of bias<br><br>Data obtained from 18 hospitals across Malaysia. These hospital are evenly distributed geographically to best represent Malaysian population in general (page 5)                                                                                                                                                                                                                                                                                                                                                                                                                                                                                                                                                                                                                                                                                                                                                                                                                                                                                                                                                                                                                                                                                                                                                                                                                                                                                                                                                                                                                                                                                                                                                                                                  |
| 11<br>12                                                                                                                                                                                     | Study size                   | 10 | Explain how the study size was arrived at<br><br>All-comers from the NCVD-ACS registry included (page 5)                                                                                                                                                                                                                                                                                                                                                                                                                                                                                                                                                                                                                                                                                                                                                                                                                                                                                                                                                                                                                                                                                                                                                                                                                                                                                                                                                                                                                                                                                                                                                                                                                                                                                                                           |
| 13<br>14<br>15<br>16<br>17<br>18<br>19<br>20<br>21                                                                                                                                           | Quantitative variables       | 11 | Explain how quantitative variables were handled in the analyses. If applicable, describe which groupings were chosen and why<br><br>The patients were divided into 2 groups: STEMI with cardiogenic shock and STEMI without cardiogenic shock. This division is to compare the increase in mortality rate from the cardiogenic shock group in relation to the non-cardiogenic shock (page 5)                                                                                                                                                                                                                                                                                                                                                                                                                                                                                                                                                                                                                                                                                                                                                                                                                                                                                                                                                                                                                                                                                                                                                                                                                                                                                                                                                                                                                                       |
| 22<br>23<br>24<br>25<br>26<br>27<br>28<br>29<br>30<br>31<br>32<br>33<br>34<br>35<br>36<br>37<br>38<br>39<br>40<br>41<br>42<br>43<br>44<br>45<br>46<br>47<br>48<br>49<br>50<br>51<br>52<br>53 | Statistical methods          | 12 | (a) Describe all statistical methods, including those used to control for confounding<br>(b) Describe any methods used to examine subgroups and interactions<br>(c) Explain how missing data were addressed<br>(d) <i>Cohort study</i> —If applicable, explain how loss to follow-up was addressed<br><i>Case-control study</i> —If applicable, explain how matching of cases and controls was addressed<br><i>Cross-sectional study</i> —If applicable, describe analytical methods taking account of sampling strategy<br>(e) Describe any sensitivity analyses<br><br>Categorical variables were described as numbers and percentages. The differences were analysed by chi-square test or Fisher exact test. Continuous variables were expressed as median and differences were analysed using t-test. To avert biases in the estimates and loss of power, missing data for explanatory variables were assumed to be missing at random. A generalized linear model with a log link, binomial distribution, and a robust variance estimator was used to estimate the risk ratios. The risk ratios represent the relative risk for mortality of the non-cardiogenic shock group compared to the cardiogenic shock group. Subsequently, risk ratios of CS patients with PCI done and without PCI were also compared. Variables that were statistically significantly different (a 2-sided P value of less than 0.05) between the CS and non-CS patients, that were of clinical importance, and that had sufficient outcomes in the respective subcategories were adjusted for. Finally, binary logistics regression was executed to determine the independent predictors of in-hospital mortality among CS patients. All analyses were conducted using SPSS statistical software (version 21, IBM SPSS Statistics, USA). (page 6) |

Continued on next page

1  
2  
3  
4  
5  
6  
7  
8  
9  
10  
11  
12  
13  
14  
15  
16  
17  
18  
19  
20  
21  
22  
23  
24  
25  
26  
27  
28  
29  
30  
31  
32  
33  
34  
35  
36  
37  
38  
39  
40  
41  
42  
43  
44  
45  
46  
47  
48  
49  
50  
51  
52  
53  
54  
55  
56  
57  
58  
59  
60

| <b>Results</b>           |     |                                                                                                                                                                                                                                                                                                                                                                                                                                                                                                                             |
|--------------------------|-----|-----------------------------------------------------------------------------------------------------------------------------------------------------------------------------------------------------------------------------------------------------------------------------------------------------------------------------------------------------------------------------------------------------------------------------------------------------------------------------------------------------------------------------|
| Participants             | 13* | (a) Report numbers of individuals at each stage of study—eg numbers potentially eligible, examined for eligibility, confirmed eligible, included in the study, completing follow-up, and analysed<br><b>A total of 16517 STEMI patients analysed (page 7)</b><br>(b) Give reasons for non-participation at each stage <b>N/A</b><br>(c) Consider use of a flow diagram <b>N/A</b>                                                                                                                                           |
| Descriptive data         | 14* | (a) Give characteristics of study participants (eg demographic, clinical, social) and information on exposures and potential confounders<br><b>16,517 STEMI patients from Malaysian NCVD-ACS registry year 2006 to 2013 (page 7)</b><br>(b) Indicate number of participants with missing data for each variable of interest<br>(c) <i>Cohort study</i> —Summarise follow-up time (eg, average and total amount)<br><b>In-hospital and 30-day follow up (page 7 and 8)</b>                                                   |
| Outcome data             | 15* | <i>Cohort study</i> —Report numbers of outcome events or summary measures over time<br><b>Refer tables IV and V in the manuscript (page 18)</b><br><i>Case-control study</i> —Report numbers in each exposure category, or summary measures of exposure<br><i>Cross-sectional study</i> —Report numbers of outcome events or summary measures                                                                                                                                                                               |
| Main results             | 16  | (a) Give unadjusted estimates and, if applicable, confounder-adjusted estimates and their precision (eg, 95% confidence interval). Make clear which confounders were adjusted for and why they were included<br><b>Refer tables IV and V in the manuscript (page 18)</b><br>(b) Report category boundaries when continuous variables were categorized<br>(c) If relevant, consider translating estimates of relative risk into absolute risk for a meaningful time period                                                   |
| Other analyses           | 17  | Report other analyses done—eg analyses of subgroups and interactions, and sensitivity analyses <b>N/A</b>                                                                                                                                                                                                                                                                                                                                                                                                                   |
| <b>Discussion</b>        |     |                                                                                                                                                                                                                                                                                                                                                                                                                                                                                                                             |
| Key results              | 18  | Summarise key results with reference to study objectives<br><b>Done. Refer discussion and summary sections in the manuscript (page 12 –conclusion)</b>                                                                                                                                                                                                                                                                                                                                                                      |
| Limitations              | 19  | Discuss limitations of the study, taking into account sources of potential bias or imprecision. Discuss both direction and magnitude of any potential bias<br><b>We have listed the limitations and strengths of this study in the manuscript (page 3 and 4)</b>                                                                                                                                                                                                                                                            |
| Interpretation           | 20  | Give a cautious overall interpretation of results considering objectives, limitations, multiplicity of analyses, results from similar studies, and other relevant evidence<br><b>Done in the discussion section (page 9-11)</b>                                                                                                                                                                                                                                                                                             |
| Generalisability         | 21  | Discuss the generalisability (external validity) of the study results<br><b>Done in the discussion section (page 9-11)</b>                                                                                                                                                                                                                                                                                                                                                                                                  |
| <b>Other information</b> |     |                                                                                                                                                                                                                                                                                                                                                                                                                                                                                                                             |
| Funding                  | 22  | Give the source of funding and the role of the funders for the present study and, if applicable, for the original study on which the present article is based<br><br><b>The NCVD is sponsored by the Ministry of Health Malaysia and co-sponsored by National Heart Association of Malaysia (NHAM). The Clinical Research Centre (CRC) is providing the technical support in the form of clinical epidemiology expertise, biostatistics and Information and Communication Technology (ICT) services. (page 5 – methods)</b> |

1  
2  
3 \*Give information separately for cases and controls in case-control studies and, if applicable, for exposed and  
4 unexposed groups in cohort and cross-sectional studies.  
5  
6

7 **Note:** An Explanation and Elaboration article discusses each checklist item and gives methodological background and  
8 published examples of transparent reporting. The STROBE checklist is best used in conjunction with this article (freely  
9 available on the Web sites of PLoS Medicine at <http://www.plosmedicine.org/>, Annals of Internal Medicine at  
10 <http://www.annals.org/>, and Epidemiology at <http://www.epidem.com/>). Information on the STROBE Initiative is  
11 available at [www.strobe-statement.org](http://www.strobe-statement.org).  
12  
13  
14  
15  
16  
17  
18  
19  
20  
21  
22  
23  
24  
25  
26  
27  
28  
29  
30  
31  
32  
33  
34  
35  
36  
37  
38  
39  
40  
41  
42  
43  
44  
45  
46  
47  
48  
49  
50  
51  
52  
53  
54  
55  
56  
57  
58  
59  
60
